# Supplementary material for: CDK4/6 inhibition triggers anti-tumour immunity
Source: Springer Nature journal article supplement (doi:10.1038/nature23465), 2017-08-01
Supplement: 41586_2017_BFnature23465_MOESM1_ESM.pdf [file 41586_2017_BFnature23465_MOESM1_ESM.pdf]

Supplementary Figure 1

Extended Data Fig. 3c

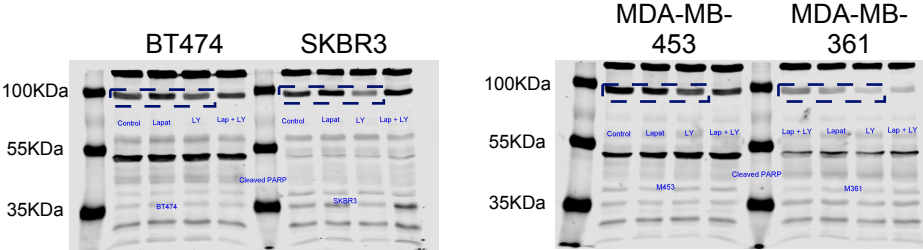

Extended Data Fig. 3d

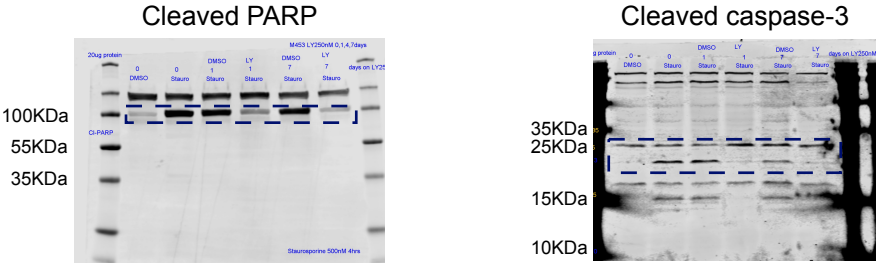

Extended Data Fig. 4g

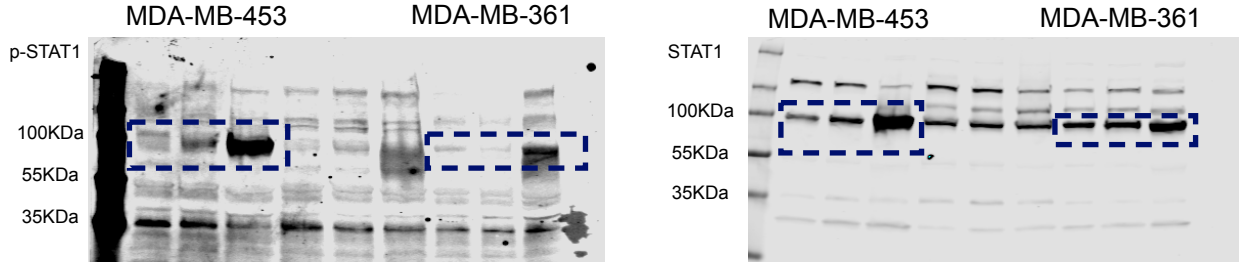

Extended Data Fig. 4h

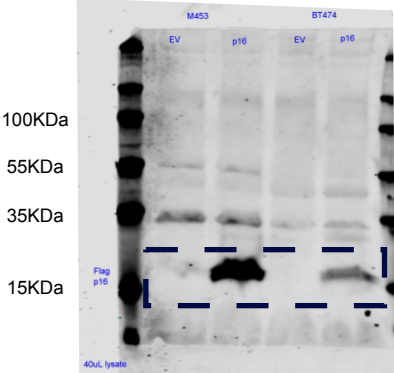

Extended Data Fig. 6a

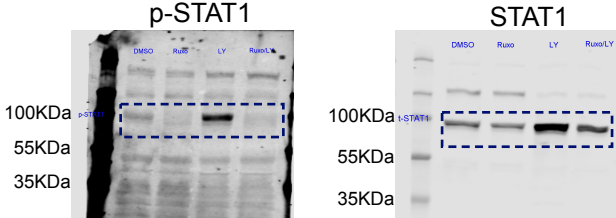

Extended Data Fig. 6c

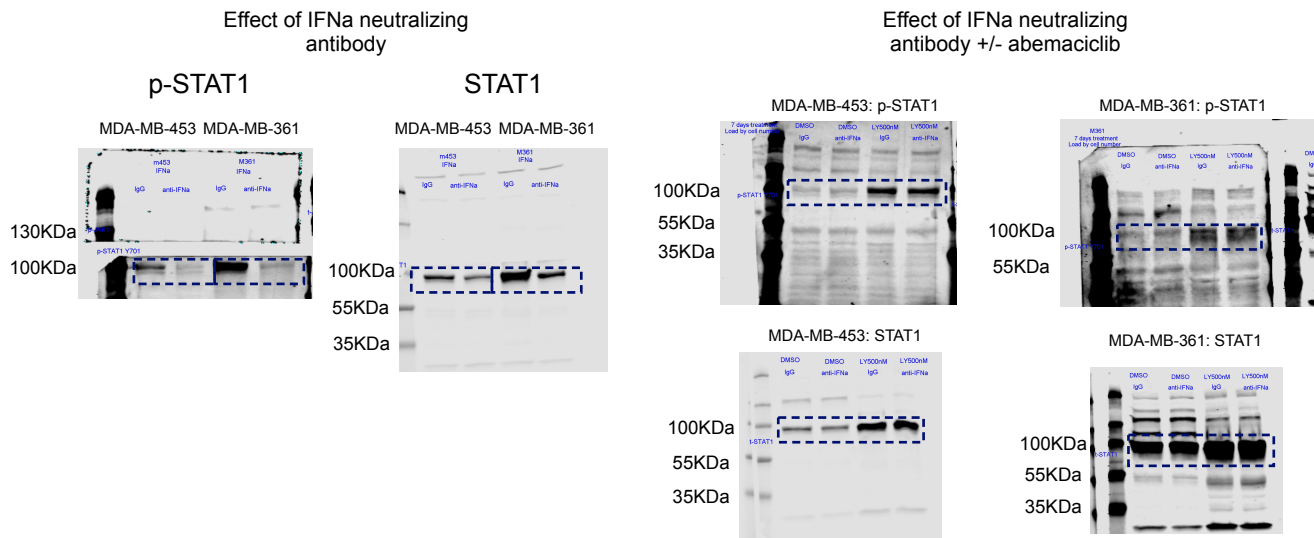

Extended Data Fig. 6d

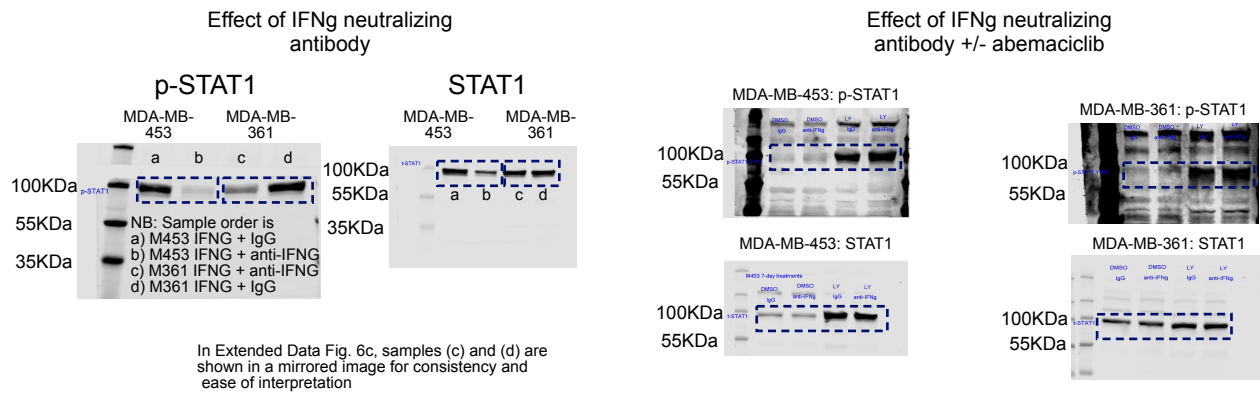

Fig. 3b

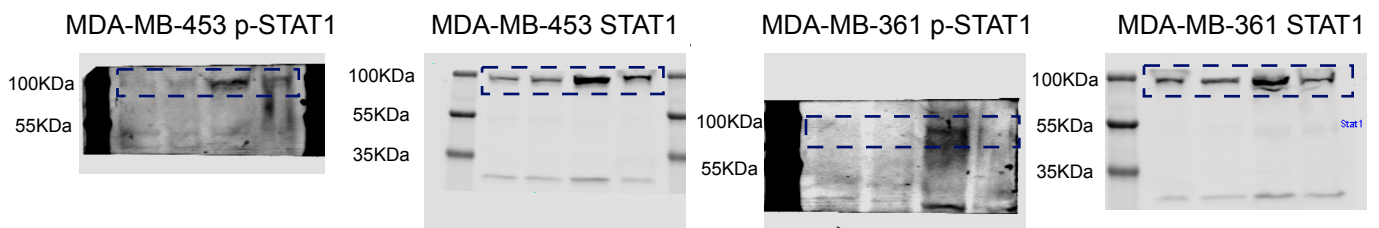

Extended Data Fig. 7b

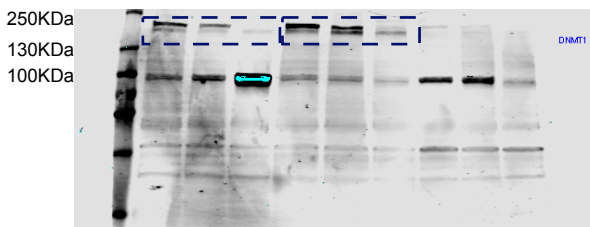

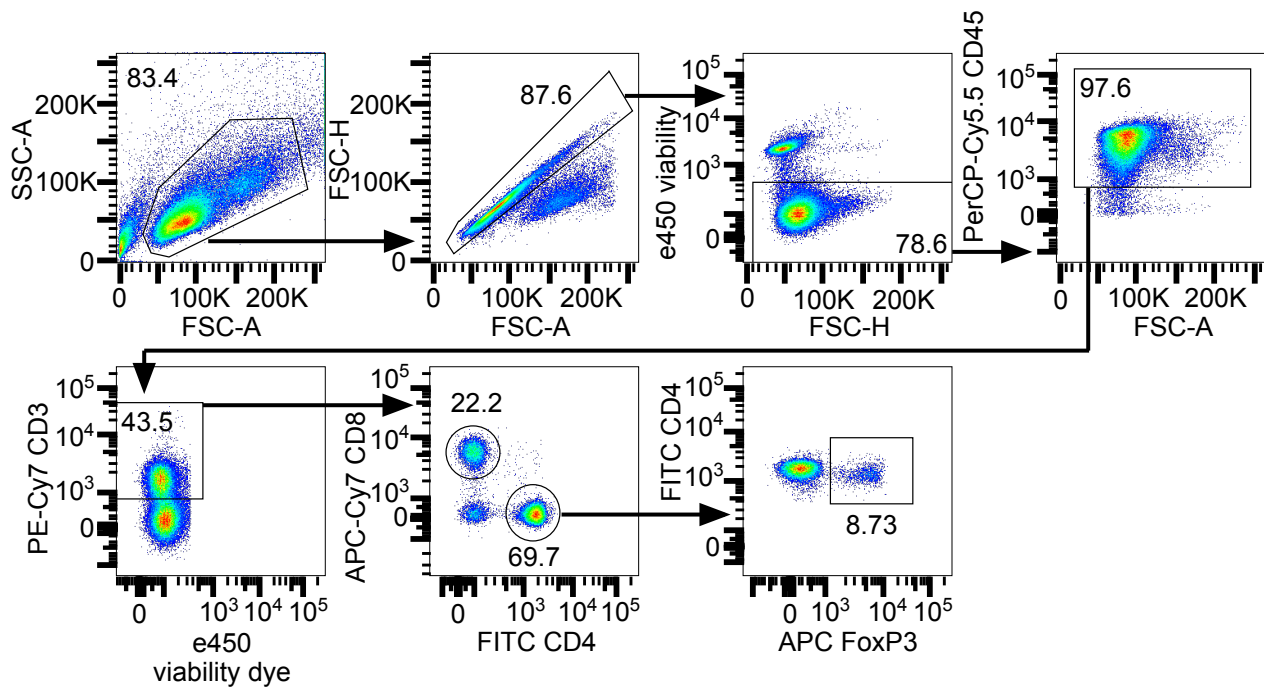

### Supplementary Methods 1. Gating strategy for T cell populations

Flow cytometry gating strategy for T cell populations (CD4+, CD8+, and CD4+ regulatory T cells) in spleen, blood, lymph node, thymus, and tumors. Representative plots from splenocytes shown.

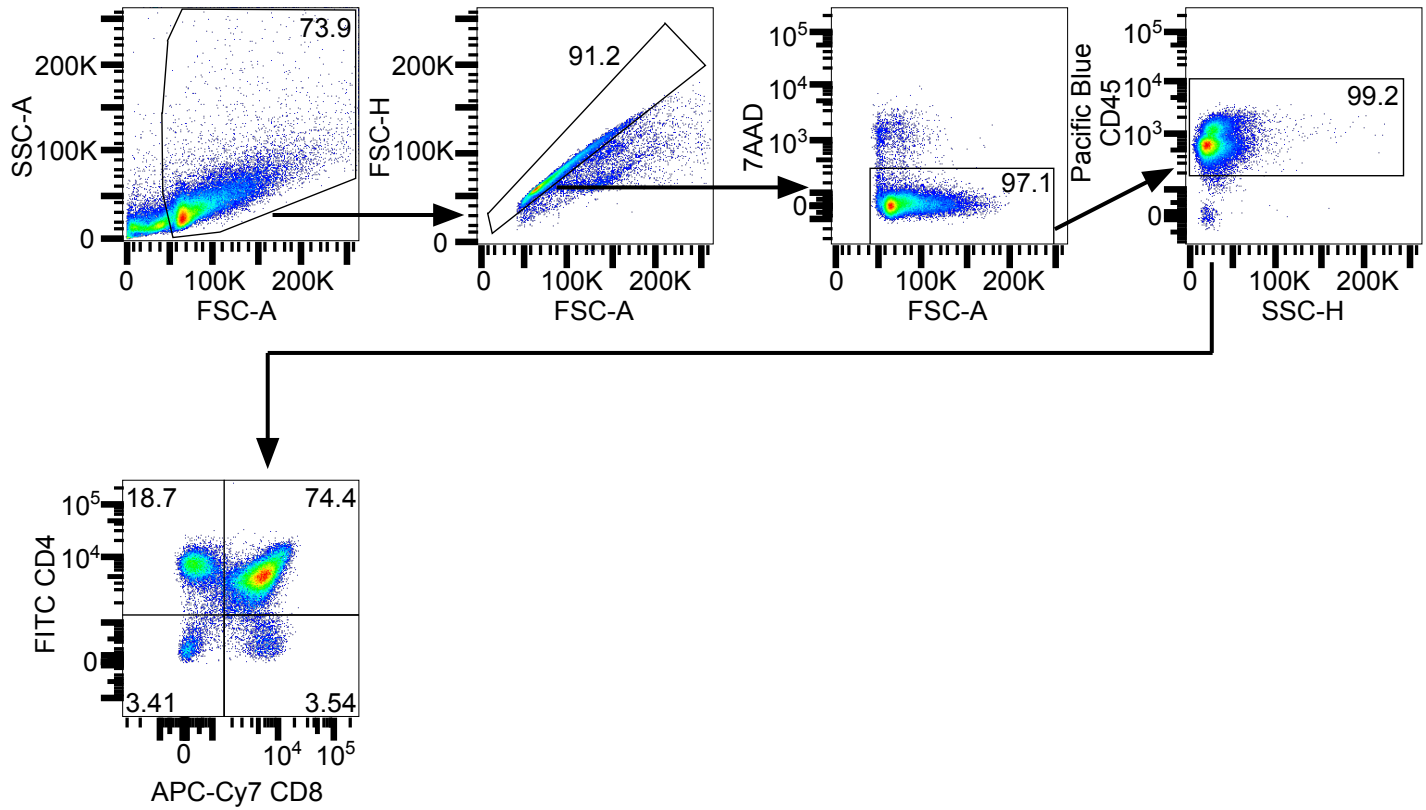

### Supplementary Methods 2. Gating strategy for thymic cell populations

Flow cytometry gating strategy for thymocytes.

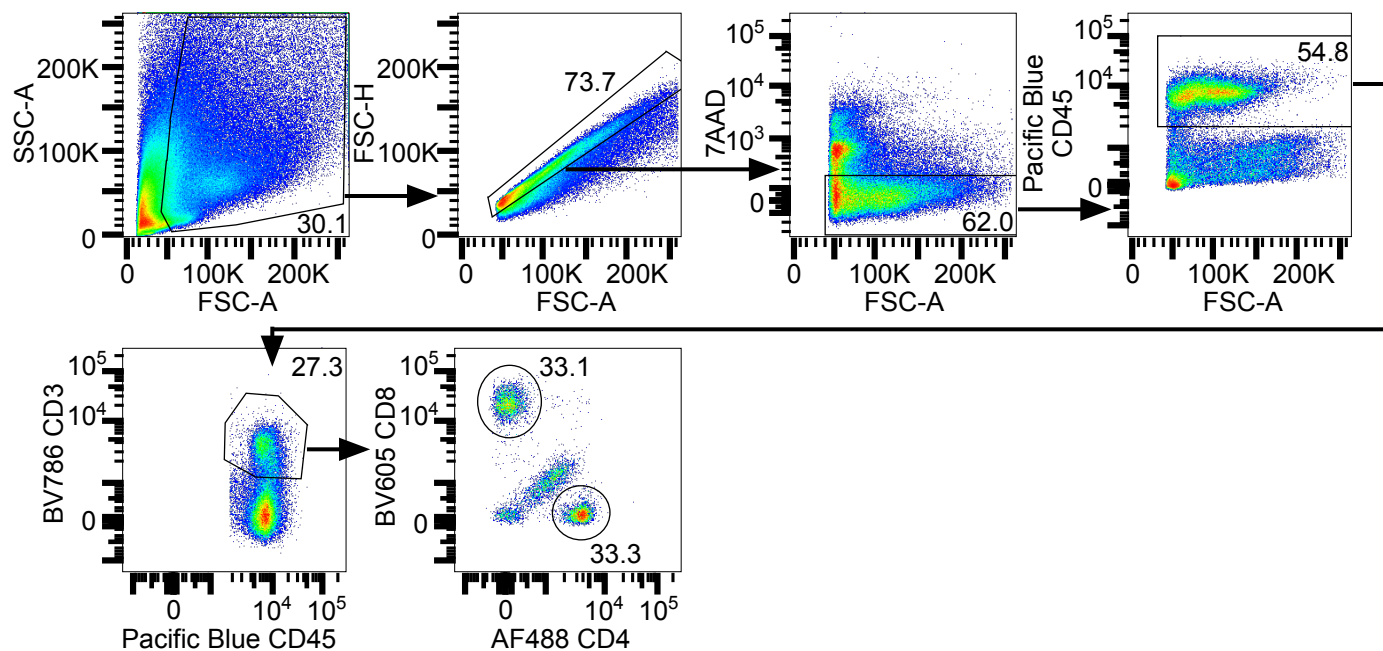

### Supplementary Methods 3. Gating strategy for inhibitory receptors on intratumoral T cells

Flow cytometry gating strategy for intratumoral CD8<sup>+</sup> and CD4<sup>+</sup> T cells in order to examine expression of PD-1, Tim-3, CTLA-4, and LAG3 in MMTV-rtTA/tetO-HER2 tumors. Representative PD-1, Tim-3, CTLA-4, and LAG3 plots for each experimental condition are shown in Figure 4h and Extended Data Figure 10d-f.
